# Supplementary material
Source: publisher figshare collection journal article supplement (https://sage.figshare.com/ndownloader/files/15253688)
Supplement: Supplementary file [file 15253688]

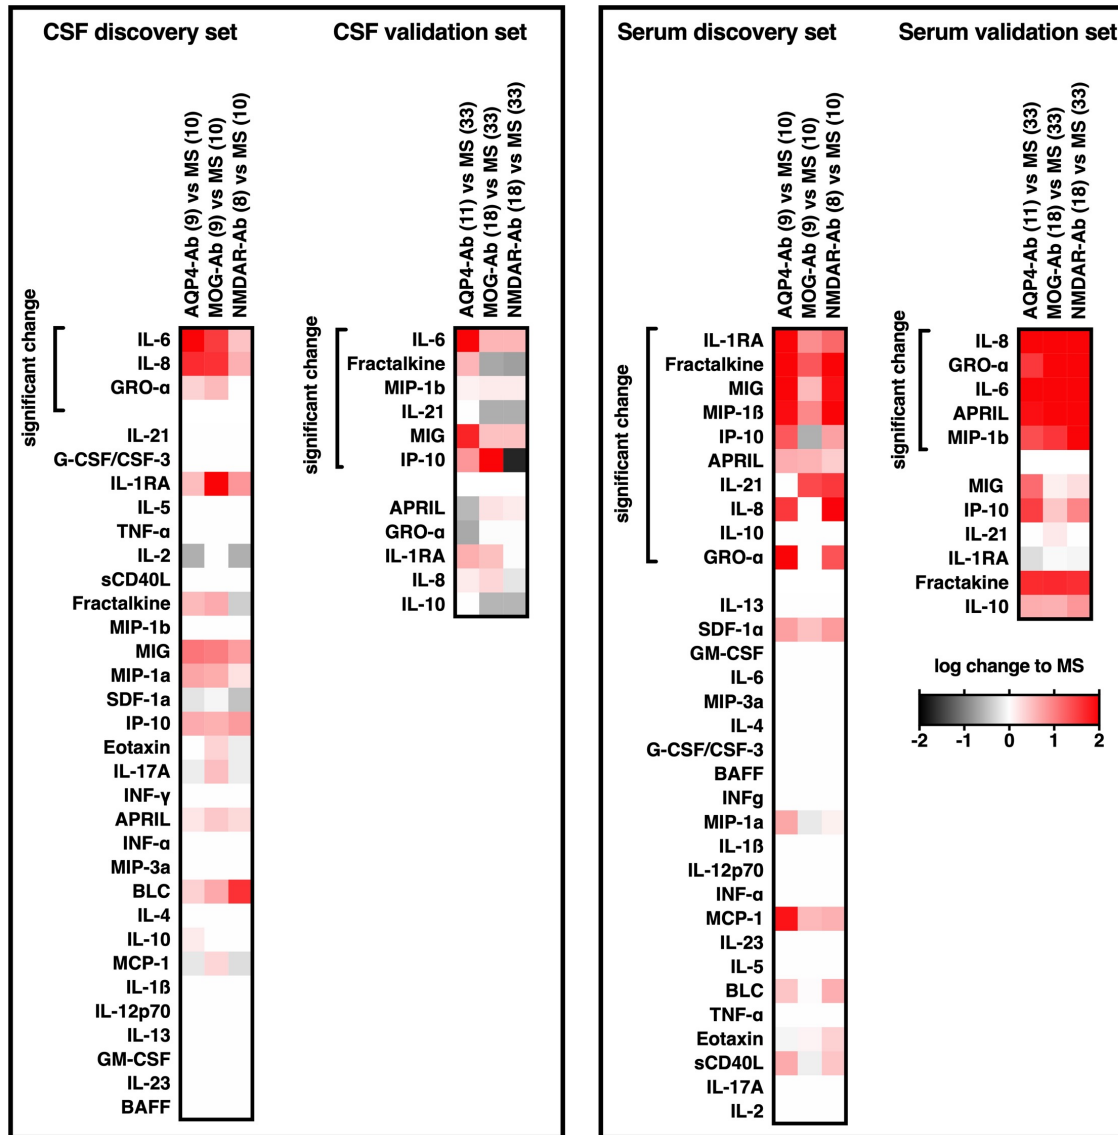

Supplementary Figure 1.

Cytokine and chemokine profile in CSF and serum of the discovery and validation set. The median log changes of median cytokine or chemokine levels compared to the MS group are shown in the heatmap. Cytokines and chemokines are organized according to their p-values. Significant changes in the CSF (AQP4-Ab and MOG-Ab versus MS) and serum (AQP4-Ab, MOG-Ab and NMDAR-Ab versus MS) are highlighted.
